# 1 Frequency of quorum sensing mutations in *Pseudomonas aeruginosa* strains isolated from 2 different environments

3  
4 Kathleen O'Connor, Conan Y. Zhao & Stephen P. Diggle\*

5  
6 *Center for Microbial Dynamics & Infection, School of Biological Sciences, Georgia Institute of*  
7 *Technology, Atlanta, GA 30332.*

8  
9 \*Correspondence: [stephen.diggle@biosci.gatech.edu](mailto:stephen.diggle@biosci.gatech.edu)

10  
11 Keywords: *Pseudomonas aeruginosa*, quorum sensing, LasR, cystic fibrosis

## 12 13 14 **Abstract**

15  
16 *Pseudomonas aeruginosa* uses quorum sensing (QS) to coordinate the expression of multiple  
17 genes necessary for establishing and maintaining infection. *lasR* QS mutations have been shown  
18 to frequently arise in cystic fibrosis (CF) lung infections, however, there has been far less emphasis  
19 on determining whether QS system mutations arise across other environments. To test this, we  
20 utilized 852 publicly available sequenced *P. aeruginosa* genomes from the *Pseudomonas*  
21 International Consortium Database (IPCD) to study *P. aeruginosa* QS mutational signatures. We  
22 found that across all isolates, LasR is the most variable protein sequence compared to other QS  
23 proteins. In order to study isolates by source, we focused on a subset of 654 isolates collected from  
24 CF, wounds, and non-infection environmental isolates, where we could clearly identify their  
25 source. Using this sub-set analysis, we found that LasR mutations are not specific to CF lungs, but  
26 are common across all environments. We then used amino acid length as a proxy for observing  
27 loss of function in LasR proteins among the strains. We found that truncated LasR proteins are  
28 more abundant in *P. aeruginosa* strains isolated from human infection than the environment.  
29 Overall, our findings suggest that the evolution of *lasR* QS mutations in *P. aeruginosa* are common  
30 and not limited to infection environments.

## 31 32 **Introduction**

33  
34 *Pseudomonas aeruginosa* is a Gram-negative opportunistic pathogen equipped with a large  
35 genome, which enables it to be metabolically versatile and capable of occupying a range of  
36 different habitats, especially human and animal impacted environments [1, 2]. It is intrinsically  
37 resistant to many classes of antibiotic, and it produces a range of tissue damaging extracellular  
38 products such as exoenzymes and phenazine pigments in order to aid its dissemination and spread  
39 within a host [2]. *P. aeruginosa* is one of the most prominent bacterial pathogens that colonizes  
40 cystic fibrosis (CF) lungs and it is often the dominant CF lung pathogen, particularly as the

41 infection becomes more chronic over time [3]. In addition, *P. aeruginosa* frequently infects  
42 chronic wounds, often in conjunction with other microbial species [4].

43

44 One of the major adaptations of *P. aeruginosa* during chronic infection is the loss of quorum  
45 sensing (QS). QS in *P. aeruginosa* regulates the expression of hundreds of genes, including those  
46 that encode for secreted products and virulence factors [5, 6]. In *P. aeruginosa*, QS is regulated by  
47 a complex hierarchical network of genes, composed of two complete *N*-acyl homoserine lactone  
48 (AHL) circuits, LasR-LasI and RhlR-RhlI, as well as an orphan regulator termed QscR [5, 7]. The  
49 Las and Rhl systems are composed of LuxR-LuxI pairs, homologous to other bacterial QS systems.  
50 The LuxR-type receptors (LasR, RhlR) act as transcriptional regulators, and the LuxI-type proteins  
51 (LasI, RhlI) are signal synthases. LasI produces 3-oxo-dodecanoyl-L-homoserine lactone (3OC12-  
52 HSL), and RhlI produces butanoyl-L-homoserine lactone (C4-HSL) [5]. Both signals can function  
53 in a combinatorial manner to regulate certain genes [8, 9]. Working in conjunction with the two  
54 AHL systems is an alkyl-quinolone (AQ) system, comprising the *pqsABCDE* operon and *pqsH*,  
55 *pqsL* and *pqsR* (*mvfR*) genes. These genes drive the synthesis and response of 2-heptyl-3-hydroxy-  
56 4-quinolone (the *Pseudomonas* quinolone signal PQS), which is used as a QS signal and which  
57 also has iron chelating properties [10, 11].

58

59 LasR was first identified in 1991 as a regulator of the *lasB* (elastase) gene [12]. It has since been  
60 described as a key QS regulator in the well-studied laboratory strains PAO1 and PA14 [2], where  
61 it has been shown to sit at the top of the QS hierarchy, regulating both the *rhl* and *pqs* systems [5,  
62 6]. *lasR* mutants have frequently been isolated from CF lungs [13-16] and more recently, some CF  
63 strains use RhlR to regulate the *rhl* and *pqs* systems in the absence of a functional LasR [6, 16-  
64 19]. The decoupling of the AHL QS hierarchy requires the inactivation of MexT, a regulator of  
65 the multi-drug efflux pump operon MexEF-OprN [18, 20]. PqsE and RhlR have also been shown  
66 to function as a ligand:receptor pair [21].

67

68 The ecological and evolutionary implications of QS re-wiring remain to be explored, and the  
69 drivers for *lasR* mutation before and during infection are unknown. To date, little is known about  
70 QS mutations outside of an infection environment, and so in this study, we explored the diversity  
71 and frequency of QS mutations across a range of ecologically distinct environments in order to  
72 determine (i) which QS genes are frequently mutated; (ii) mutational signatures, or patterns in QS  
73 gene mutation specific to isolate source.

74

## 75 **Results**

76

77 We utilized the published sequences of 852 *P. aeruginosa* isolates from the International  
78 *Pseudomonas* Consortium Database (IPCD); a database representing a range of *P. aeruginosa*  
79 strains from different sources including rivers, infections and plants [22]. We queried a number of  
80 key QS genes from the *las*, *rhl* and *pqs* systems against gene sequences from PAO1 using BLASTn

81 for all 852 isolates. We determined the putative amino acid sequence for each gene and calculated  
82 dissimilarity scores using BLOSUM80, an empirical amino acid substitution matrix [13]. All  
83 analyses were conducted in R version 4.3.

84

85 We first looked at the number of sequences we had for each QS protein, and the diversity of the  
86 protein sequences. When we queried each QS gene nucleotide sequence against the 852 isolates,  
87 the query returned less than 852 sequences for each gene. This disparity is likely due to gaps in  
88 sequences, gene deletions, and extensive mutations, preventing BLASTn from returning a query.  
89 Fig. 1A shows that a LasR query returned the fewest number of sequences, suggesting that there  
90 are many strains that contain large deletions in LasR, truncations, or are missing the LasR gene  
91 entirely. After translating the sequences, we found that LasR also had the most unique protein  
92 sequences across 852 isolates (Fig. 1B). Given this finding, we analyzed whether there was a  
93 mutational signature for the *las* system in order to determine whether certain kinds of mutation or  
94 divergence were specific to *las* genes, and if these mutations were specific to isolate source. We  
95 created PCA plots of LasR (Fig. 1C) and LasI (Fig. 1D) proteins from all returned isolates and  
96 found that the LasR protein was distributed across the PCA plot, and the most divergent strains for  
97 LasR were truncated. Compared to LasR, the other key QS proteins were more conserved across  
98 isolates.

99

100 After analyzing all QS proteins, we then specifically focused on LasR. To determine if there were  
101 LasR mutations specific to each environment, we categorized the strains by source. Using data  
102 from the IPCD, we selected a subset of 654 strains labeled as “environmental”, “cystic fibrosis” or  
103 “CF”, and “wound” or “ulcer” or “burn” and reclassified them as environmental (209 strains), CF  
104 (396 strains), or wound (wound, ulcer and burn) (49 strains); 654 total. The remaining 198 strains  
105 from the original set of 852 strains were of uncertain origin and therefore not used in this particular  
106 analysis. To establish a threshold by which a protein could be deemed functional or not, we looked  
107 at truncated LasR proteins within each environment. We compared the amino acid length of LasR  
108 in the IPCD strains to the PAO1 LasR protein - which is equal in length to many commonly  
109 researched strains including PA14, PAK and an epidemic CF strain, LESB58. Our assumption was  
110 that a truncated protein due to shortened DNA sequence or an early stop site, would lead to a  
111 nonfunctional protein. We used a stringent 100% length as a cut-off, and any protein shorter than  
112 full-length was considered truncated. Fig. 2A shows the proportion of each group that had  
113 truncated LasR proteins with CF, environmental, and wound isolates having 20%, 11% and 30%  
114 truncations respectively. We also used a PCA plot to visualize LasR amino acid variation by  
115 environment using BLOSUM80 generated dissimilarity scores (Fig. 2B). Overall, we found that  
116 *lasR* mutations are ubiquitous across all environments, but there is a larger percentage of strains  
117 with truncated LasR proteins found in infection environments.

118

119

120

## 121 Discussion

122

123 In *P. aeruginosa*, *lasR* QS mutants are frequently isolated from human chronic infection, but it has  
124 remained unclear whether such mutants specifically evolve in infection environments or are  
125 common across multiple environments. Using a publicly available database of 852 fully sequenced  
126 isolates from CF, wounds and non-infection based (environmental) isolates, we determined the  
127 frequency and pattern of *lasR* and other QS mutations in *P. aeruginosa*. We found that (i) LasR is  
128 the most variable protein of all the major QS proteins; (ii) *lasR* mutations are found in isolates  
129 across all environments, suggesting that any environment can drive the evolution of these  
130 mutations.

131

132 But what does drive the evolution of *lasR* mutations and what fitness benefits do *lasR* mutations  
133 provide to *P. aeruginosa* isolates or populations? First, *lasR* mutants could arise in populations  
134 through social cheating, where mutants exploit the social interactions and exoproducts produced  
135 by *lasR* intact cells [23, 24]. Controlled experiments have shown that *lasR* mutants can socially  
136 exploit wild type cells *in vitro* [24] and *in vivo* [25], although it is unclear whether the spatial  
137 structuring found within infections will allow the close proximity of different isolates to allow for  
138 regular cheating. Importantly, QS genes have recently been shown to be down-regulated during  
139 infection compared to *in vitro* conditions, questioning the long-held belief that a functional QS  
140 system is essential for *P. aeruginosa* to establish and persist in human infections [6, 26]. This  
141 would likely reduce any fitness benefits of being a *lasR* mutant persisting via social cheating.  
142 Second, *lasR* mutants may have increased fitness in particular environments due to certain  
143 phenotypes driven by the mutation being beneficial. For example, *lasR* mutations have previously  
144 been shown to confer a growth advantage with particular carbon and nitrogen sources, including  
145 amino acids [27]. Third, *lasR* mutants may be more competitive than *lasR* positive cells, which  
146 provides fitness benefits against other *P. aeruginosa* strains or other species.

147

148 There are, however, likely evolutionary benefits for both the maintenance and loss of LasR so that  
149 both *lasR* positive and negative strains can stably coexist in heterogenous populations and  
150 contribute to an overall community function. In recent support of this idea, it has been shown that  
151 (i) *lasR*- strains overproduce Rhl-associated factors and cross-feed wild type cells in low iron  
152 environments, which will likely impact infection dynamics of mixed populations [28]; (ii) mixed  
153 *lasR* +/- populations display decreased virulence in mouse models of infection [25]; (iii) mixed  
154 populations exhibit enhanced tolerance to beta-lactam antibiotics [29]. Taken together, this  
155 suggests there are likely to be considerable fitness advantages to cells growing in heterogeneous  
156 QS populations, perhaps as a bet-hedging mechanism for future disturbance events.

157

158 Overall, our work highlights that *lasR* mutations are the most commonly found QS mutation across  
159 different environments, although we do not know whether mutations in the *lasR* gene always  
160 results in a loss of QS function. Indeed, recent studies on QS in *P. aeruginosa* has revealed that

161 the complex and intertwined *las*, *rhl*, and *pqs* systems can be rewired in the event that *lasR*  
162 becomes mutated [16, 18][9, 19]. It is not always clear whether these strains are entirely QS-null  
163 or if they have re-wired their QS systems to circumvent the loss of *lasR*. Further work is needed  
164 to determine why strains lose functional LasR proteins, and what fitness benefits the strains or  
165 community gains. Future work should more strongly focus on the ecology of mixed QS-  
166 phenotypes to better understand QS-involvement in infection and other environments. With  
167 ongoing work identifying QS-inhibitors targeting the *las* QS system, the frequency of *lasR* mutated  
168 strains found in our study suggests that this particular pursuit is likely to fail.

169

## 170 **Materials and Methods**

171

172 **Querying QS genes from the International Pseudomonas Consortium Database.** Using  
173 nucleotide sequences from PAO1, we queried QS genes (see Fig. 1) using BLASTn for isolates  
174 from the IPCD [12]. We chose this strain because it is a fully sequenced, frequently used lab strain.  
175 We then translated these sequences into protein sequences calculating putative amino acid  
176 sequence similarities using BLOSUM80 [13]. First, we compared genes found in each isolate  
177 against our reference strain, PAO1, normalized against the similarity of the reference against itself.  
178 We then calculated the mean dissimilarity score of all isolates compared to PAO1. Some isolates  
179 were missing genes due to sequencing errors or true truncations, the number of isolates with a  
180 given gene present was under 852 for all genes. All analyses, including translation steps were  
181 conducted in R version 4.3. All code and files are available on Github  
182 ([https://github.gatech.edu/login?return\\_to=https%3A%2F%2Fgithub.gatech.edu%2Fkoconnor36%2FFrequency\\_of\\_quorum\\_sensing\\_mutations\\_in\\_Pa2021](https://github.gatech.edu/login?return_to=https%3A%2F%2Fgithub.gatech.edu%2Fkoconnor36%2FFrequency_of_quorum_sensing_mutations_in_Pa2021)).  
183

184

185 **Creating an IPCD database using BLASTn.** We pulled IPCD data from GenBank. We used the  
186 `makeblastdb/` command to generate a database of all isolate contigs.

187

188 **Using BLASTn to find QS genes for each isolate.** Using our generated database, we queried the  
189 PAO1 sequence from each gene, found from Genbank, against the database. We generated csv  
190 files for each gene which included the gene sequences for each isolate.

191

192 **Translating nucleotide to amino acid sequence.** We translated genes to proteins using a custom  
193 R script. We first queried only for sequences starting with a canonical ATG start codon. We  
194 exclude sequences with fully unresolvable nucleotides (coded as “-“), but allowed fuzzy codons  
195 so long as they resolved to unambiguous amino acids. We translated the sequences meeting these  
196 criteria using the `translate` function from the BioStrings R package (v.2.58.0).

197

198 **Calculating dissimilarity scores for isolates’ QS proteins.** All sequence analyses were  
199 performed in R (v.4.0.2) using the Biostrings package v.2.58.0. We compared isolate protein  
200 sequences to PAO1 protein sequences using BLOSUM80, a matrix designed to compared protein

201 sequences within species. We found that close to 50% of all isolate proteins were identical to  
202 PAO1.

203

204 **Determining truncation rates for LasR and categorizing isolates by location.** We determined  
205 the length of the reference LasR protein, from PAO1, compared to each isolate protein. If the  
206 isolate protein was 100% or less of the length of the PAO1 protein, we categorized it as truncated.  
207 Sequences were categorized as CF-originated (CF), environmental (ENV), or wound (WND). If  
208 the sequence was entered into IPCD as environmental, we adopted that label. Additionally, we  
209 included sequences labeled from animal hosts as environmental. For CF, we only included  
210 sequences with sources explicitly labeled as CF. For wound, we included sequences labeled as  
211 wound, ulcer, and burn.

212

213 **Author contributions.** SPD and KOC designed the study. KOC and CYZ performed the *in silico*  
214 analysis of the data. All authors contributed to the writing of the manuscript.

215

216 **Competing interests.** The authors declare no competing interests.

217

218 **Funding and acknowledgements.** We wish to thank The Cystic Fibrosis Foundation  
219 (DIGGLE18I0 and DIGGLE20G0) to SPD for funding. We also thank members of the Diggle Lab  
220 and Jon Gerhart for helpful discussion.

221

## 222 **Figure legends**

223

224 **Figure 1. Determining variability in QS proteins between *P. aeruginosa* isolates from the**  
225 **IPCD.** (A) We created a database of 852 isolates and used PAO1 to search for the QS proteins of  
226 each isolate. Due to the variation in each isolate's genome and due to gaps in sequencing, each  
227 protein queried returned fewer than 852 sequences (shown in gray). We also determined the  
228 number of unique sequences for each protein and found that LasR had the highest number of  
229 unique sequences (in color). (B) Using a custom dissimilarity metric (BLOSUM80), we calculated  
230 mean dissimilarity scores. We found that LasR had the highest mean dissimilarity score compared  
231 to all QS proteins, and the largest variation. We conducted principal component analyses (PCA)  
232 and plotted the similarity scores of all isolates for the LasR protein (C) and the LasI protein (D).

233

234 **Figure 2. LasR truncations are found in isolates from all sources.** To observe the fraction of  
235 truncated proteins across all environments, we categorized the isolates into 3 groups: cystic fibrosis  
236 (CF), environmental (ENV) or wound (WND). (A) We show the number of truncated proteins out  
237 of the total number of isolates in each group. The PCA plot (B) depicts the similarity scores for all  
238 groups compared, and we see the arm of truncated proteins consisted primarily of CF and WND  
239 isolates.

240

241

## 242 References

- 243
- 244 1. **Rahme LG, Stevens EJ, Wolfort SF, Shao J, Tompkins RG et al.** Common virulence  
245 factors for bacterial pathogenicity in plants and animals. *Science* 1995;268(5219):1899-1902.
  - 246 2. **Diggle SP, Whiteley M.** Microbe Profile: *Pseudomonas aeruginosa*: opportunistic  
247 pathogen and lab rat. *Microbiology* 2020;166(1):30-33.
  - 248 3. **Elborn JS.** Cystic fibrosis. *The Lancet* 2016;388(10059):2519-2531.
  - 249 4. **Ibberson CB, Whiteley M.** The social life of microbes in chronic infection. *Curr Opin*  
250 *Microbiol* 2020;53:44-50.
  - 251 5. **Whiteley M, Diggle SP, Greenberg EP.** Progress in and promise of bacterial quorum  
252 sensing research. *Nature* 2017;551(7680):313-320.
  - 253 6. **Azimi S, Klementiev AD, Whiteley M, Diggle SP.** Bacterial Quorum Sensing During  
254 Infection. *Annu Rev Microbiol* 2020;74:201-219.
  - 255 7. **Schuster M, Sexton DJ, Diggle SP, Greenberg EP.** Acyl-homoserine lactone quorum  
256 sensing: from evolution to application. *Annu Rev Microbiol*, Review 2013;67(1):43-63.
  - 257 8. **Cornforth DM, Popat R, McNally L, Gurney J, Scott-Phillips TC et al.** Combinatorial  
258 quorum sensing allows bacteria to resolve their social and physical environment. *Proc Natl Acad*  
259 *Sci U S A* 2014;111(11):4280-4284.
  - 260 9. **Gurney J, Azimi S, Brown SP, Diggle SP.** Combinatorial quorum sensing in  
261 *Pseudomonas aeruginosa* allows for novel cheating strategies. *Microbiology (Reading)*  
262 2020;166(8):777-784.
  - 263 10. **Dubern JF, Diggle SP.** Quorum sensing by 2-alkyl-4-quinolones in *Pseudomonas*  
264 *aeruginosa* and other bacterial species. *Mol Biosyst*, Review 2008;4(9):882-888.
  - 265 11. **Diggle SP, Matthijs S, Wright VJ, Fletcher MP, Chhabra SR et al.** The *Pseudomonas*  
266 *aeruginosa* 4-quinolone signal molecules HHQ and PQS play multifunctional roles in quorum  
267 sensing and iron entrapment. *Chem Biol* 2007;14(1):87-96.
  - 268 12. **Gambello MJ, Iglewski BH.** Cloning and characterization of the *Pseudomonas*  
269 *aeruginosa lasR* gene, a transcriptional activator of elastase expression. *J Bacteriol*  
270 1991;173(9):3000-3009.
  - 271 13. **Smith EE, Buckley DG, Wu Z, Saenphimmachak C, Hoffman LR et al.** Genetic  
272 adaptation by *Pseudomonas aeruginosa* to the airways of cystic fibrosis patients. *Proc Natl Acad*  
273 *Sci U S A* 2006;103(22):8487-8492.
  - 274 14. **Ciofu O, Mandsberg LF, Bjarnsholt T, Wassermann T, Hoiby N.** Genetic adaptation  
275 of *Pseudomonas aeruginosa* during chronic lung infection of patients with cystic fibrosis: strong  
276 and weak mutators with heterogeneous genetic backgrounds emerge in *mucA* and/or *lasR* mutants.  
277 *Microbiology* 2010;156(Pt 4):1108-1119.
  - 278 15. **Jiricny N, Molin S, Foster K, Diggle SP, Scanlan PD et al.** Loss of social behaviours in  
279 populations of *Pseudomonas aeruginosa* infecting lungs of patients with cystic fibrosis. *PLoS One*  
280 2014;9(1):e83124.
  - 281 16. **Feltner JB, Wolter DJ, Pope CE, Groleau MC, Smalley NE et al.** LasR Variant Cystic  
282 Fibrosis Isolates Reveal an Adaptable Quorum-Sensing Hierarchy in *Pseudomonas aeruginosa*.  
283 *mBio* 2016;7(5):e01513-01516-01519.
  - 284 17. **Diggle SP, Winzer K, Chhabra SR, Worrall KE, Camara M et al.** The *Pseudomonas*  
285 *aeruginosa* quinolone signal molecule overcomes the cell density-dependency of the quorum  
286 sensing hierarchy, regulates *rhl*-dependent genes at the onset of stationary phase and can be  
287 produced in the absence of LasR. *Mol Microbiol* 2003;50(1):29-43.

- 288 18. **Kostylev M, Kim DY, Smalley NE, Salukhe I, Greenberg EP et al.** Evolution of the  
289 *Pseudomonas aeruginosa* quorum-sensing hierarchy. *Proc Natl Acad Sci U S A*  
290 2019;116(14):7027-7032.
- 291 19. **Cruz RL, Asfahl KL, Van den Bossche S, Coenye T, Crabbe A et al.** RhlR-Regulated  
292 Acyl-Homoserine Lactone Quorum Sensing in a Cystic Fibrosis Isolate of *Pseudomonas*  
293 *aeruginosa*. *mBio* 2020;11(2).
- 294 20. **Oshri RD, Zrihen KS, Shner I, Omer Bendori S, Eldar A.** Selection for increased  
295 quorum-sensing cooperation in *Pseudomonas aeruginosa* through the shut-down of a drug  
296 resistance pump. *ISME J* 2018;12(10):2458-2469.
- 297 21. **Mukherjee S, Moustafa DA, Stergioula V, Smith CD, Goldberg JB et al.** The PqsE and  
298 RhlR proteins are an autoinducer synthase-receptor pair that control virulence and biofilm  
299 development in *Pseudomonas aeruginosa*. *Proc Natl Acad Sci U S A* 2018;115(40):E9411-E9418.
- 300 22. **Freschi L, Vincent AT, Jeukens J, Emond-Rheault JG, Kukavica-Ibrulj I et al.** The  
301 *Pseudomonas aeruginosa* Pan-Genome Provides New Insights on Its Population Structure,  
302 Horizontal Gene Transfer, and Pathogenicity. *Genome Biol Evol* 2019;11(1):109-120.
- 303 23. **West SA, Griffin AS, Gardner A, Diggle SP.** Social evolution theory for microorganisms.  
304 *Nat Rev Microbiol*, Review 2006;4(8):597-607.
- 305 24. **Diggle SP, Griffin AS, Campbell GS, West SA.** Cooperation and conflict in quorum-  
306 sensing bacterial populations. *Nature* 2007;450(7168):411-414.
- 307 25. **Rumbaugh KP, Diggle SP, Watters CM, Ross-Gillespie A, Griffin AS et al.** Quorum  
308 sensing and the social evolution of bacterial virulence. *Curr Biol* 2009;19(4):341-345.
- 309 26. **Cornforth DM, Dees JL, Ibberson CB, Huse HK, Mathiesen IH et al.** *Pseudomonas*  
310 *aeruginosa* transcriptome during human infection. *Proc Natl Acad Sci U S A* 2018;115(22):E5125-  
311 E5134.
- 312 27. **D'Argenio DA, Wu M, Hoffman LR, Kulasekara HD, Deziel E et al.** Growth  
313 phenotypes of *Pseudomonas aeruginosa lasR* mutants adapted to the airways of cystic fibrosis  
314 patients. *Mol Microbiol* 2007;64(2):512-533.
- 315 28. **Mould DL, Botelho NJ, Hogan DA.** Intraspecies Signaling between Common Variants  
316 of *Pseudomonas aeruginosa* Increases Production of Quorum-Sensing-Controlled Virulence  
317 Factors. *mBio* 2020;11(4).
- 318 29. **Azimi S, Roberts AEL, Peng S, Weitz JS, McNally A et al.** Allelic polymorphism shapes  
319 community function in evolving *Pseudomonas aeruginosa* populations. *ISME J* 2020;14(8):1929-  
320 1942.



Figure 1

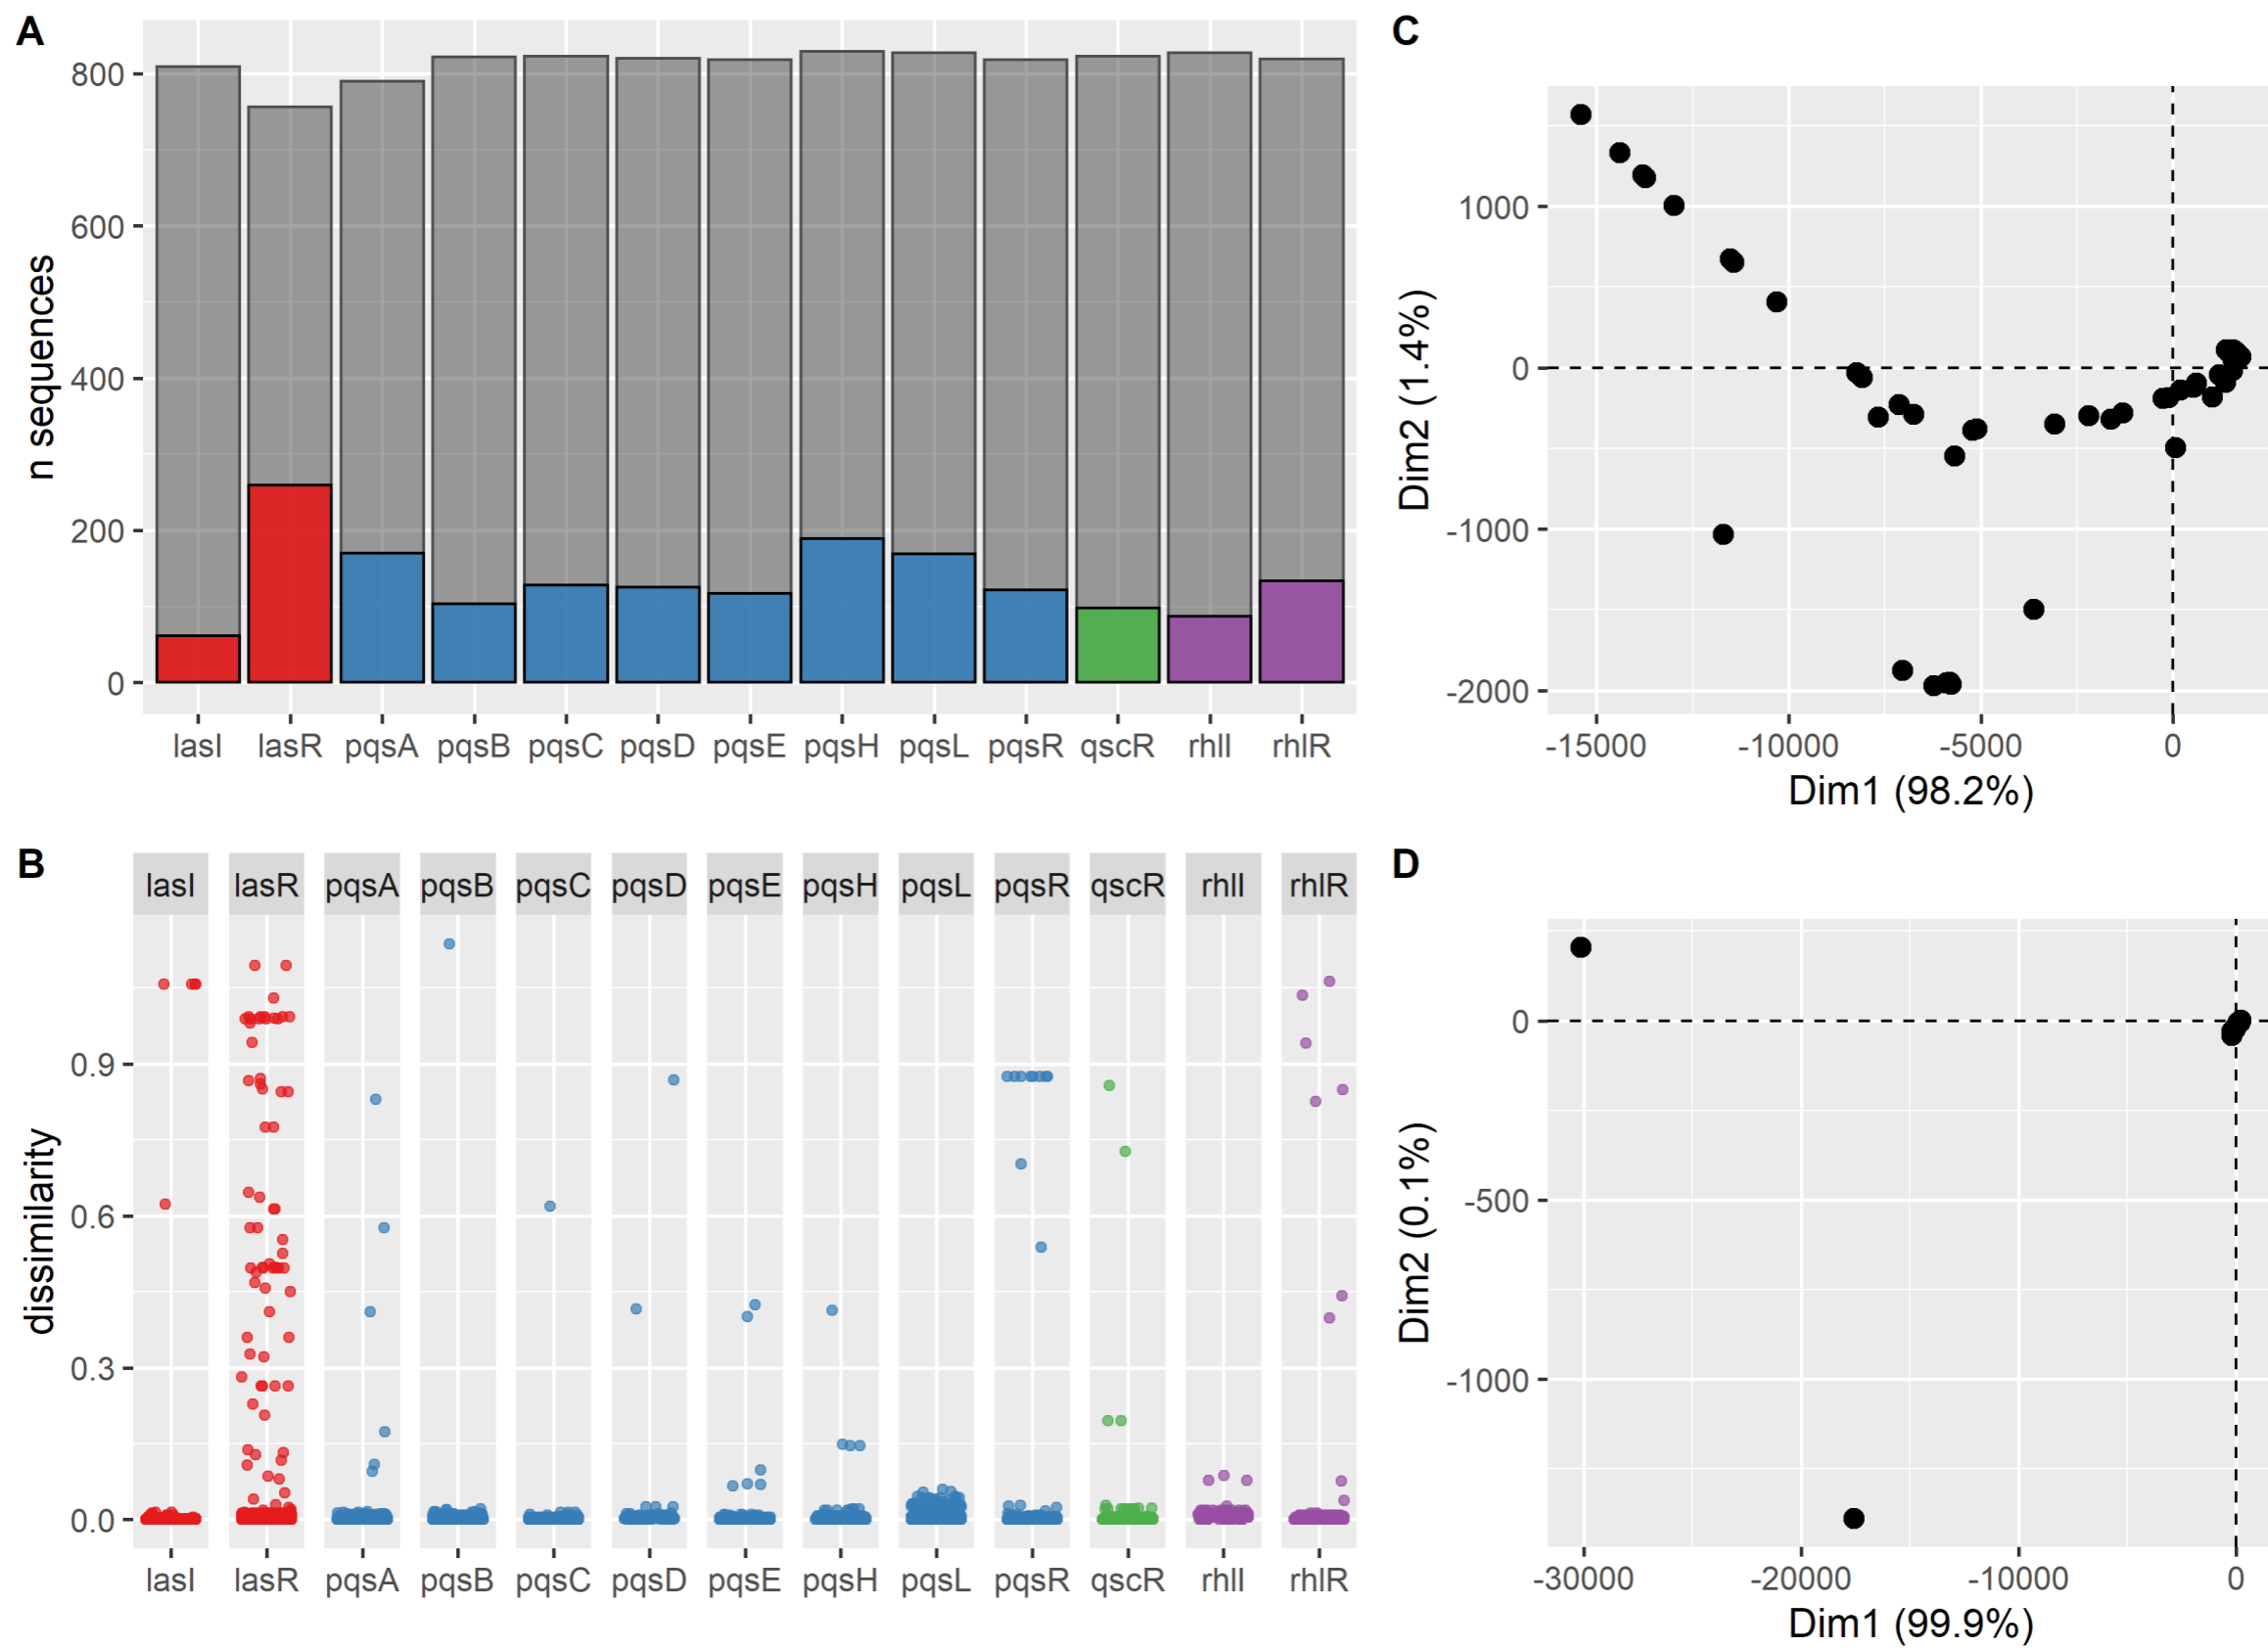

# Figure 2

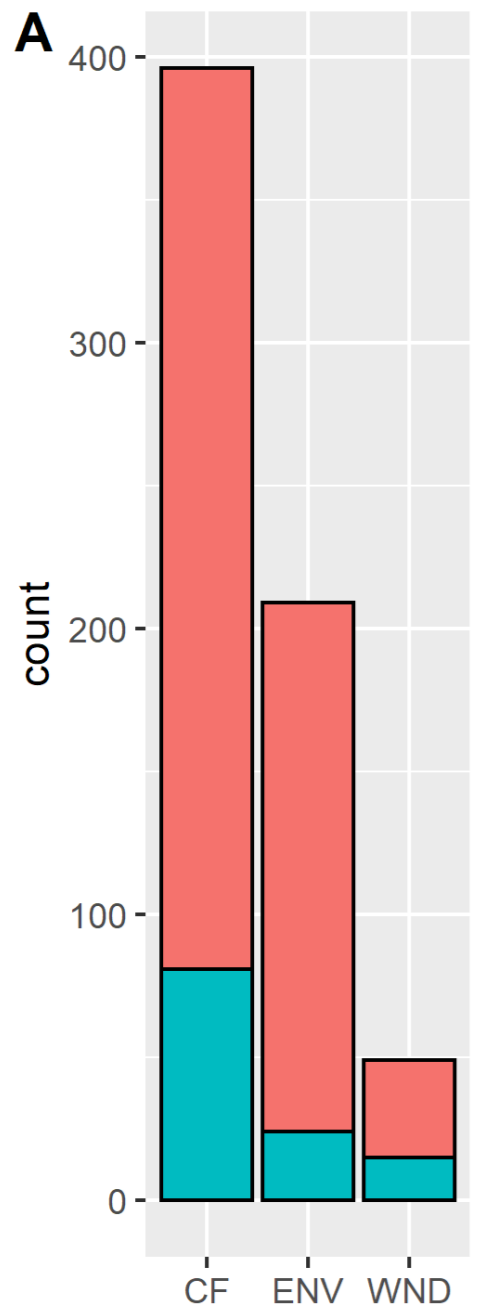

TRUNCATED

- FULL
- TRUNC

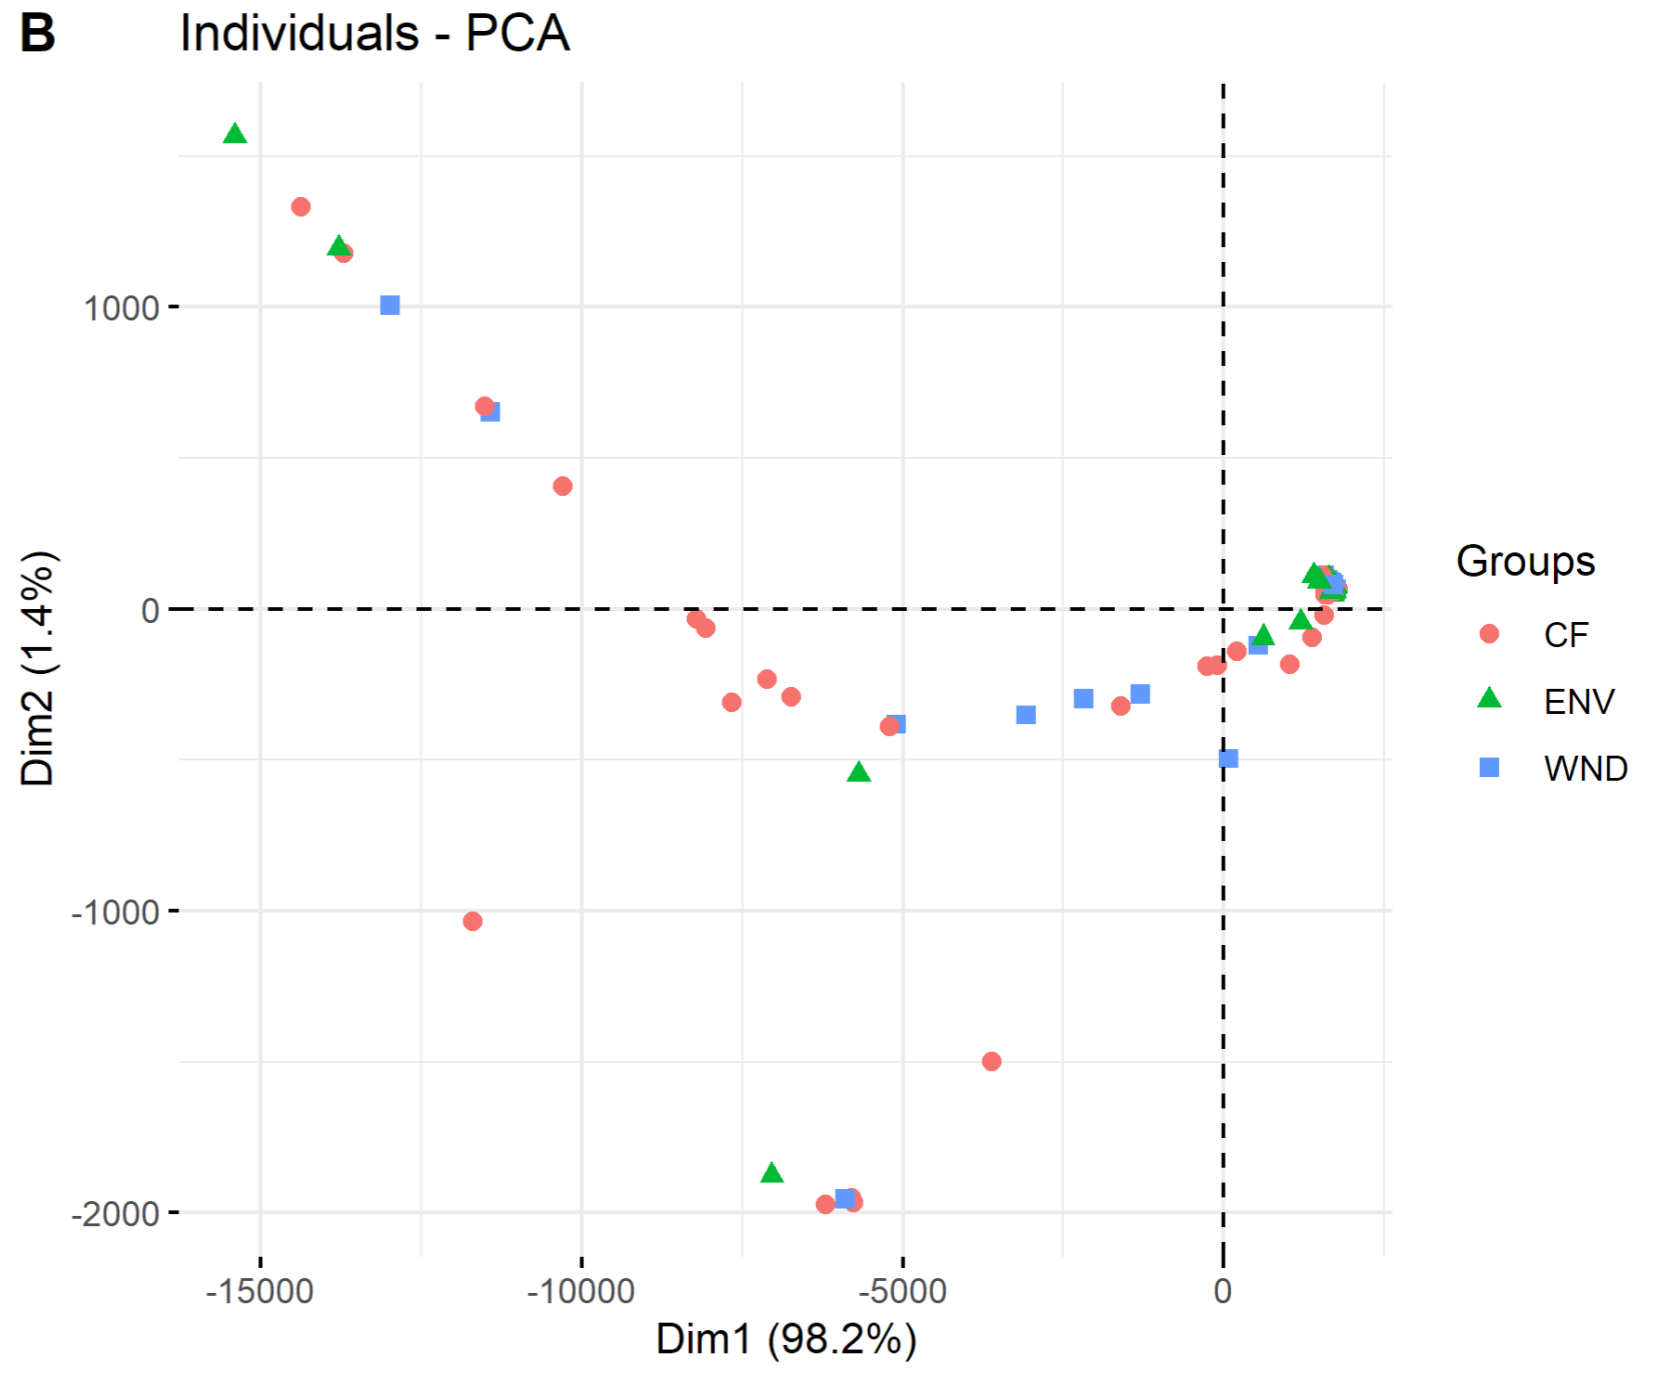

Source: https://www.biorxiv.org/content/biorxiv/early/2021/02/23/2021.02.22.432365.full.pdf
